# Supplementary material for: Multifunctional Pd/CCS-Cu-MOF Microcapsule Catalyst: A Biomimetic Design Inspired by Metalloenzyme Structures for Sustainable Glycerol Valorizing into Glycerol Carbonate
Source: Research Square preprint supplement (doi:10.21203/rs.3.rs-6418048/v1), 2025-05-11
Supplement: Supplementary file 1 [file e8d669b6638ea97bdee037f1.docx]

**Supporting Information**

**Multifunctional Pd/CCS-Cu-MOF Microcapsule Catalyst: A Biomimetic Design Inspired by Metalloenzyme Structures for Sustainable Glycerol Valorizing into Glycerol Carbonate**

Shuqi Qi, Jing Xu, Nan Wang, Pingbo Zhang*, Mingming Fan*

The Key Laboratory of Synthetic and Biological Colloids, Ministry of Education, School of Chemical and Material Engineering, Jiangnan University, Wuxi 214122, P.R. China

* Corresponding authors.

E-mail addresses: pingbozhang@126.com, fanmm2000@126.com

**1. Experimental Procedures**

**Characterization**

Scanning electron microscope (SEM) images were taken on a Hitachi S-4800 Scanning electron microscope. Transmission electron microscopy (TEM) images were taken on a Talos F200X G2 transmission electron microscope. Thermo Fisher iCAP PRO measured optical emission spectroscopy (ICP-OES). N2 adsorption and desorption isotherms were obtained at 298K using a Quantachrome Autosorb-IQ instrument. Powder X-ray diffraction patterns were measured with a Bruker D8 with Cu Kα radiation (λ =1.5406 Å). FT-IR spectroscopy was performed on a Nicolet iS50 FT-IR infrared spectrometer. The chemical valence states and elements present in the catalyst surface were analyzed through X-ray photoelectron spectrometry (XPS) equipped with Al/Κα radiation (Thermo, ESCALAB250XI). The obtained binding energies were referenced to the C 1s peak at 284.8 eV. The glycerin contact angle was tested using an optical contact angle measuring instrument (OCA 40) at an ambient temperature of 25 ℃, and the average of three measurements was taken. The thermal stability of the composites was evaluated using a thermogravimetric analyzer (TGA/DSC1/1100SF). Each sample was initially weighed at approximately 5 mg and subsequently placed in a ceramic crucible. The samples were then subjected to a heating process, wherein they were heated from 30 °C to 700 °C under a nitrogen atmosphere (nitrogen flow rate of 50 mL/min) at a heating rate of 20 °C/min.

**2. Catalyst Performance Testing**

We employed a silanization method for gas chromatography performance testing to achieve reproducible and distinct chromatographic peaks. Specifically, a measured amount of the reaction solution was mixed with an excess of silanizing agent in a 1:9:3 mass ratio of the reaction solution, hexamethyldisilazane, and trimethylchlorosilane, and placed in a 10 mL centrifuge tube[1]. The tube was sealed, stirred for 5 minutes, and then allowed to stand at room temperature for 30 minutes, during which a white NH4Cl precipitate formed. Subsequently, 0.5 mL of a 251.08 g/L tritiated tetraethylene glycol internal standard solution was added, and the mixture was centrifuged at 2500 rpm for 5 minutes. The supernatant was then collected for gas chromatographic analysis. The analysis of the reaction products was carried out using a Nexis GC-2030 gas chromatograph. The conditions were a KB-Wax capillary column (30 m × 0.32 mm × 0.50 μm), nitrogen as the carrier gas, and a split ratio of 1/20. The column temperature was programmed to hold at 80°C for 2 minutes, then increase at 30°C/min to 260°C. The injector temperature was set to 280°C, and the detector temperature to 300°C. Tetraethylene glycol triester (3-acetonitrile) was used as the internal standard, with tetraethylene glycol as the reference standard, and quantification was performed using the internal standard method. The yield and selectivity of the reaction were evaluated based on the peak areas of the silylated derivatives of unreacted glycerol and the formed carbonate. The standard curves for the internal standard method are shown in Figures S1 and S2[2].





**Fig.S1** Internal standard curve of glycerol





**Fig.S2** Internal standard curve of glycerol carbonate

Among them,

mglycerol denotes the feed amount of glycerol;

mInternal standard denotes the mass of the internal standard;

Mglycerol denotes the molecular weight of glycerol;

Mglycerol carbonate denotes the molecular weight of glycerol carbonate.


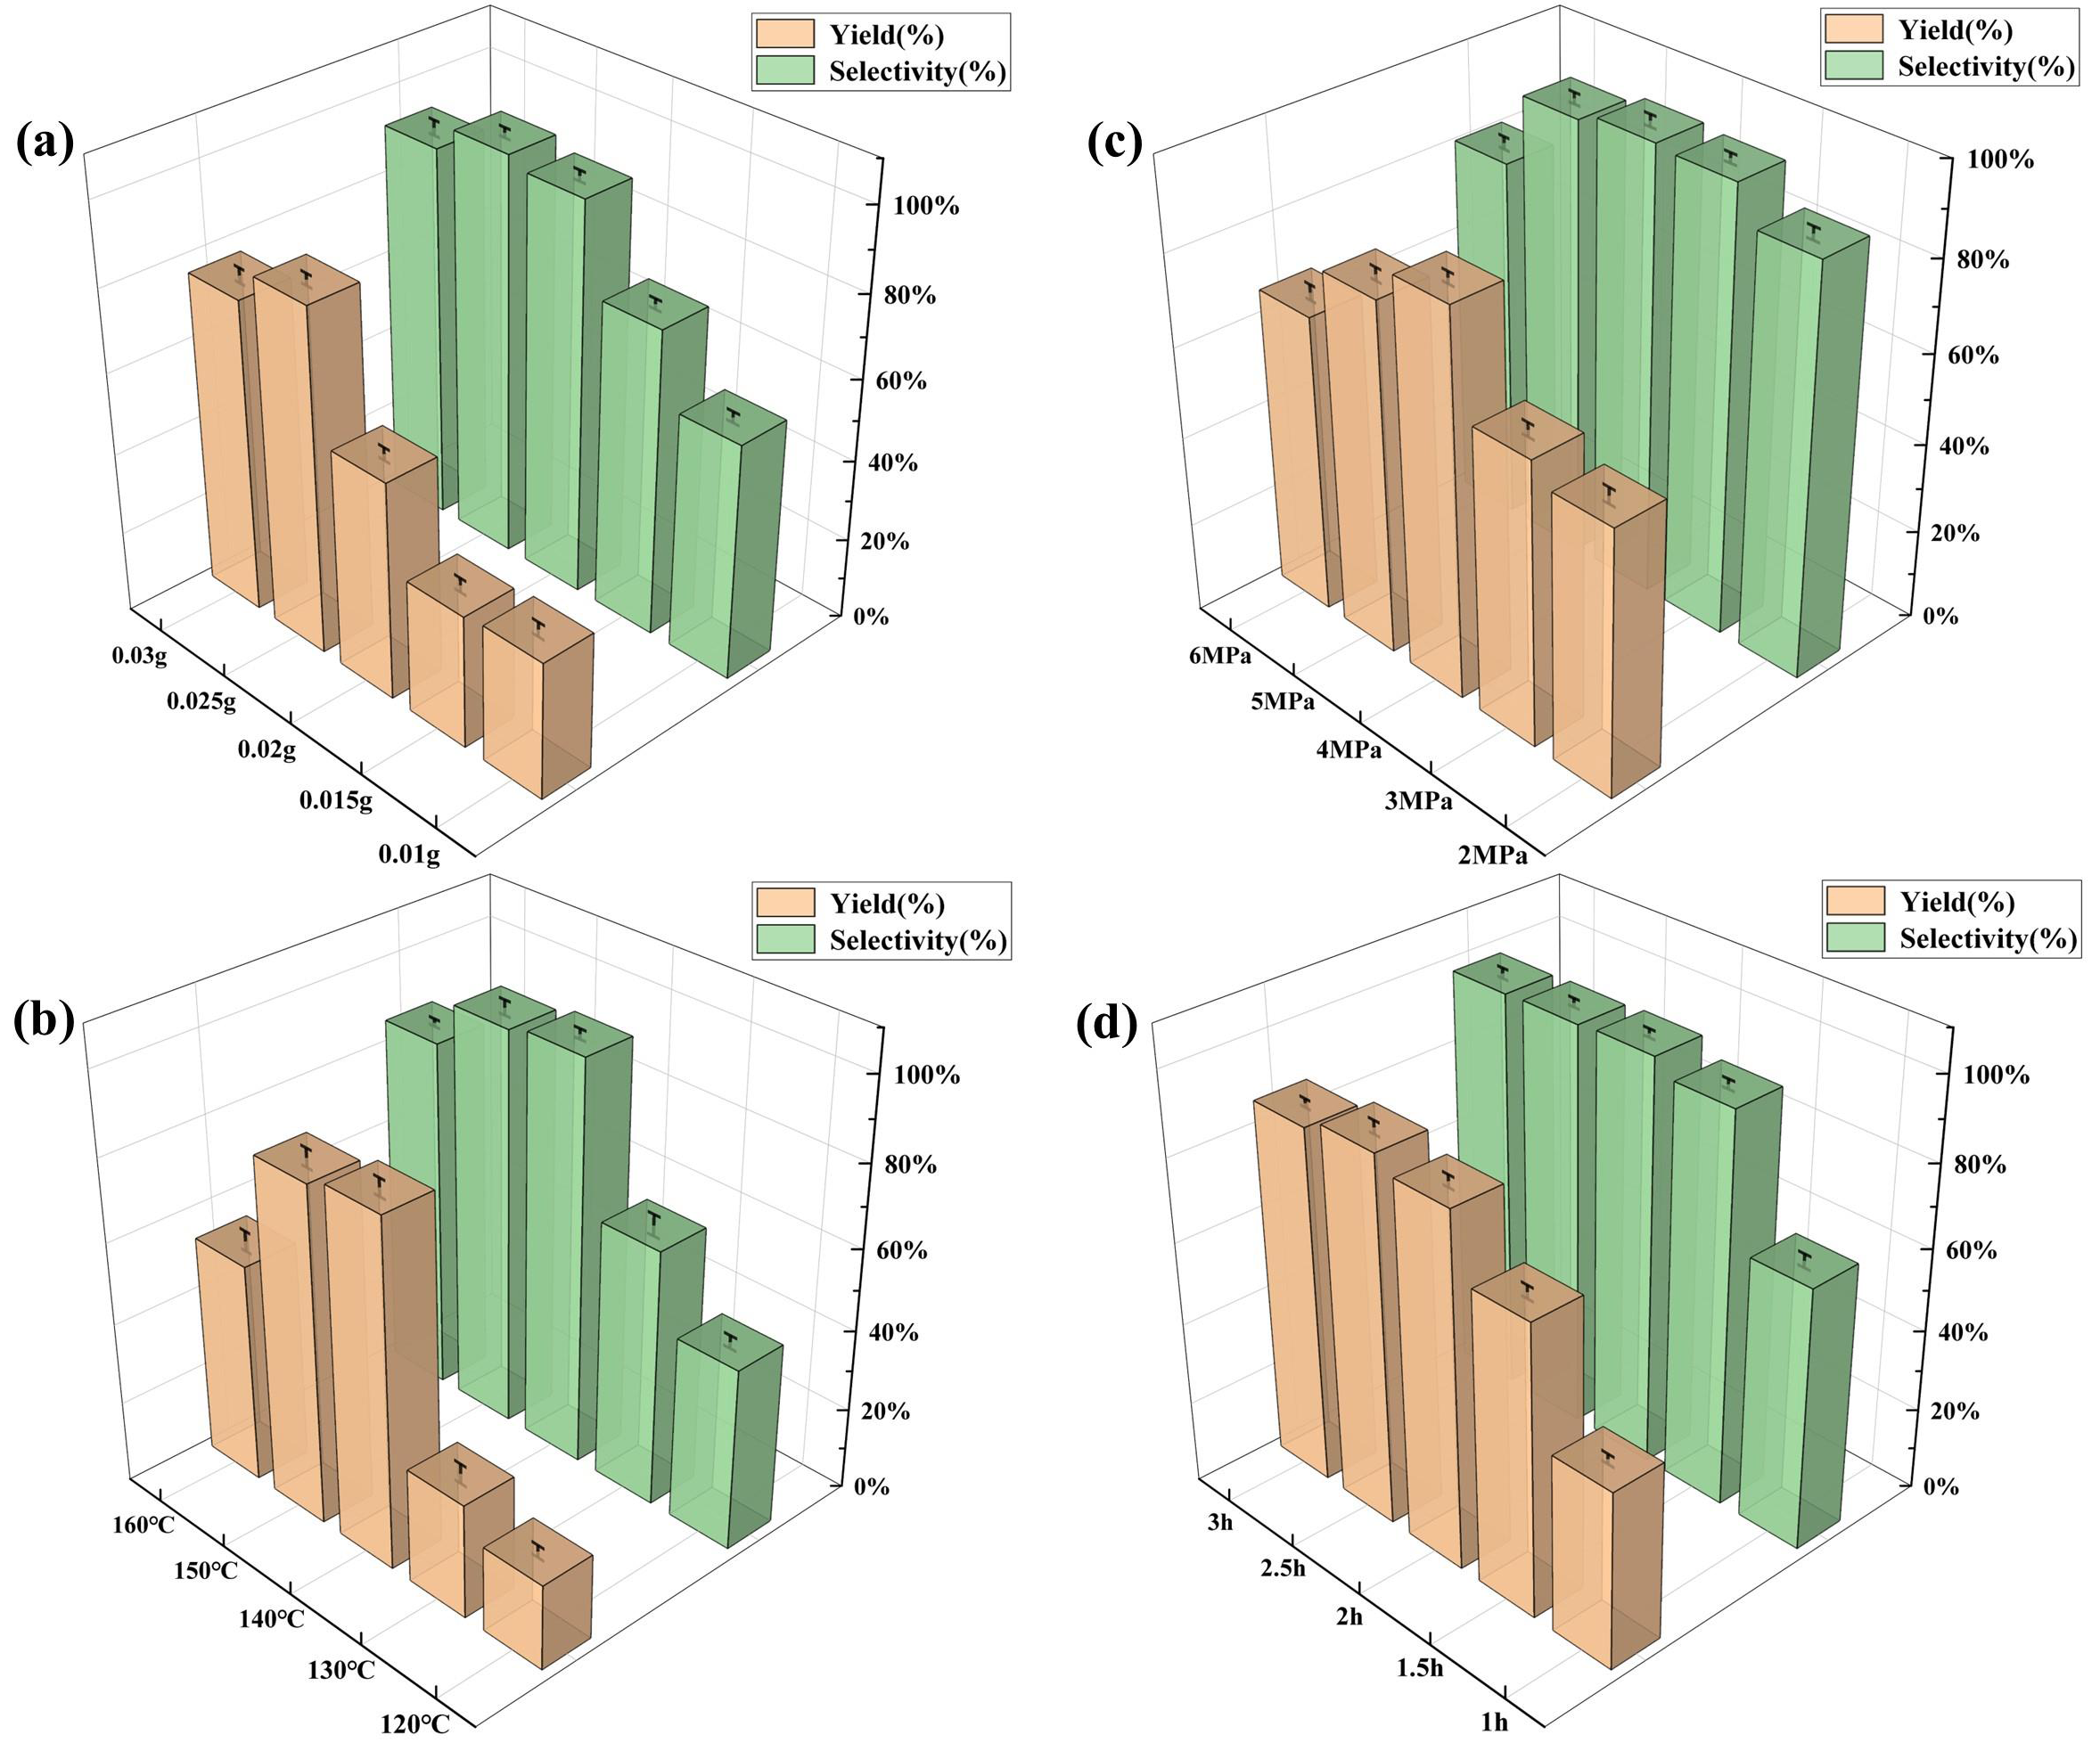


**Fig.S3** The optimization of the Pd/CCS-Cu-MOF catalyst regarding (a) amount, (b) temperature, (c) pressure, (d) time

**References**

1. Z. Lv, P. Huang, P. Zhang, M. Fan, P. Jiang, Y. Leng, Efficient synthesis of glycerol carbonate by doping metallic copper in palladium-catalyzed glycerol system for carbonylation reaction, Catalysis Science & Technology 14 (2024) 145-152. https://doi.org/10.1039/D3CY01189E.
2. J. Zhang, Z. Lv, P. Zhang, M. Fan, P. Jiang, Y. Leng, Confinement of Ultrasmall Pd Clusters Within Nanosized ZIF-8-Derived Cu-N-C Materials for Efficient and Stable Synthesis of Glycerol Carbonate from Glycerol, Catalysis Letters 154 (2024) 6389-6399. https://doi.org/10.1007/s10562-024-04799-4.
